# 1 Spontaneous rate of clonal mutations in *Daphnia galeata*

2 Markus Pfenninger<sup>1,2,3</sup>, Halina Binde Doria<sup>2</sup>, Jana Nickel<sup>4</sup>, Anne Thielsch<sup>5</sup>, Klaus Schwenk<sup>5</sup>, Mathilde  
3 Cordellier<sup>4</sup>

4 <sup>1</sup>Dept. Molecular Ecology, Senckenberg Biodiversity and Climate Research Centre, Senckenberganlage  
5 25, 60325 Frankfurt am Main, Germany

6 <sup>2</sup>Institute for Molecular and Organismic Evolution, Johannes Gutenberg University, Johann-Joachim-  
7 Becher-Weg 7, 55128 Mainz, Germany

8 <sup>3</sup>LOEWE Centre for Translational Biodiversity Genomics, Senckenberg Biodiversity and Climate  
9 Research Centre, Senckenberganlage 25, 60325 Frankfurt am Main, Germany

10 <sup>4</sup>Institut für Zoologie, Fakultät für Mathematik, Informatik und Naturwissenschaften, Universität  
11 Hamburg, Martin-Luther-King Platz 3, 20146 Hamburg, Germany

12 <sup>5</sup>Institute for Environmental Sciences, Universität Koblenz-Landau, Fortstraße 7, 76829 Landau,  
13 Germany

14

## 15 *Abstract*

16 Mutations are the ultimate source of heritable variation and therefore the fuel for evolution, but direct  
17 estimates exist only for few species. We estimated the spontaneous nucleotide mutation rate among  
18 clonal generations in the waterflea *Daphnia galeata* with a short term mutation accumulation  
19 approach. Individuals from eighteen mutation accumulation lines over five generations were deep  
20 genome sequenced to count de novo mutations that were not present in a pool of F1 individuals,  
21 representing the parental genotype. We identified 12 new nucleotide mutations in 90 clonal  
22 generational passages. This resulted in an estimated haploid mutation rate of  $0.745 \times 10^{-9}$  (95% c.f.  
23  $0.39 \times 10^{-9} - 1.26 \times 10^{-9}$ ), which is slightly lower than recent estimates for other *Daphnia* species. We  
24 discuss the implications for the population genetics of Cladocerans.

## 25 *Introduction*

42 The rate at which spontaneous mutations occur as well as their mutational spectrum influence many  
43 important evolutionary parameters and processes. It is relevant for the equilibrium rate of genomic  
44 base composition (Hiroshi Akashi and Eyre-Walker 2012), genetic diversity of populations (Johnson and  
45 Barton 2005) and the occurrence rate of genetic diseases (Acuna-Hidalgo, et al. 2016). The *de novo*  
46 mutation rate determines the possibility (Pfenninger, et al. 2015) and speed of adaptation (Sniegowski  
47 and Gerrish 2010) to different environmental conditions. Not the least, knowledge of the mutation  
48 rate is essential to estimate effective population size (Charlesworth 2009), population history (Schiffels  
49 and Durbin 2014) or divergence times (Ho 2014).

50 However, direct estimates of the mutation rate exist only for few species because the logistical  
51 challenges for such estimations are numerous. Recently, a new approach was introduced that allows  
52 an estimation to be made with reasonable effort (Oppold and Pfenninger 2017). Essentially, the  
53 approach combines the advantages of mutation accumulation lines with those of the trio approach,

54 while avoiding their respective draw-backs (Oppold and Pfenninger 2017). We adjusted this method  
55 here to estimate the clonal mutation rate of the water flea *Daphnia galeata*.

56 Species of the genus *Daphnia* served since decades as model organisms in ecology, evolution and  
57 ecotoxicology (Herrmann, et al. 2018; Miner, et al. 2012; Zhang, et al. 2019). *D. galeata* belongs to the  
58 *D. longispina* species complex which dominates the zooplankton of many freshwater lakes in the  
59 Holarctic (Ishida and Taylor 2007). The species, like most *Daphnia*, reproduce via cyclic  
60 parthenogenesis (Zaffagnini 1987). For most of the time, the species reproduces asexually with a  
61 generation time of a few days, while sexual reproduction usually takes only place when environmental  
62 conditions deteriorate, usually once or twice a year. The large majority of generational passages are  
63 therefore asexual and likely govern the overall rate of mutational change in these species. It was now  
64 supplemented with a highly contiguous genome draft (Nickel, et al. in prep.) and other genomic  
65 resources (Huylmans, et al. 2016), which allowed the estimation of the clonal mutation rate.

## 66 *Material and Methods*

### 67 *Setting up short term mutation accumulation lines*

68 We used three clonal lines (M5, J2 and LC3.6) to start 24 short term mutation accumulation lines  
69 (MAL). These clonal lines were hatched from resting eggs sampled in sediment cores from  
70 Müggelsee, Lake Constance (both Germany) and Jordan Reservoir (Czech Republic, see Herrmann, et  
71 al. 2018 for details) and maintained in the laboratory since. Details on the laboratory conditions for  
72 the general maintenance of *Daphnia* clonal lines can be found in Tams, et al. 2018. In short, single  
73 *Daphnia* individuals were cultured in 50 ml artificial *Daphnia* medium (Klüttgen et al. 1994) at 18 +/-  
74 1°C and a light:dark cycle of 16:8 hours. *Daphnia* individuals were fed three times a week with  
75 *Acutodesmus obliquus* (1 mg C/ml) and medium was changed weekly.

76 A single individual from each clone was chosen as F<sub>0</sub> ancestor for eight MALs for each respective clone.  
77 As it is not possible to re-sequence the genome from a single individual, the produced broods 1-3 and  
78 6-11 were raised, pooled and stored for sequencing. This followed the rationale that this ancestor  
79 reference pool represents the genotype of the ancestral individual, because mutations occurring in  
80 this first generational passage will not dominate the pool but rather appear in singleton reads. The  
81 MA-lines were then started from fourth and fifth broods, sisters to the F1 frozen for ancestor reference  
82 pool. This proceeding was maintained for the next four generational passages until generation F<sub>5</sub>. From  
83 this generation, all broods (up to sixteen, F6 individuals) were again pooled and used for re-sequencing.  
84 A schematic representation of the experimental design can be found in Figure 1.

### 85 *Whole genome sequencing and bioinformatic processing*

86 DNA was extracted for each pool of individual following a modified CTAB protocol, including an RNase  
87 step. The ancestor reference pool of each clone was sequenced to an expected mean coverage of 60X.  
88 After propagation for five generations broods of each of the MA-line was whole-genome sequenced  
89 to an expected mean coverage of 30X on an Illumina PE150 platform. Sequencing libraries were  
90 generated using NEBNext® DNA Library Prep Kit following manufacturer's recommendations. The  
91 genomic DNA was randomly fragmented to a size of 350bp by shearing, then DNA fragments were end  
92 polished, A-tailed, and ligated with the NEBNext adapter for Illumina sequencing, and further PCR  
93 enriched with P5 and indexed P7 oligos. The PCR products were purified (AMPure XP system) and  
94 resulting libraries were analyzed for size distribution by Agilent 2100 Bioanalyzer and quantified using

95 real-time PCR. Reads were individually adapter clipped and quality trimmed, using Trimmomatic  
96 (Bolger, et al. 2014). Data was made available at ENA (acc. nos. ERS4993274-ERS4993294).

97 The cleaned reads of the ancestors and the MA lines were processed according to the best practices  
98 of the GATK-pipeline (McKenna, et al. 2010). Reads were mapped with bwa mem (Li and Durbin 2009)  
99 against the reference genome draft (Nickel, et al. in prep.) and filtered using a combination of Picard  
100 tools v1.123 (<https://broadinstitute.github.io/picard/>) to mark the duplicates and GATK v.3.3.0  
101 (McKenna, et al. 2010) for realignment around indels and recalibration of bases. The resulting bam  
102 files were then prepared according to the input needed for accuMulate (Winter, et al. 2018). Which  
103 means that each sample was individually identified at the sample (SM:) field of the read-group tag and  
104 merged together with Picard's MergeSamFiles.

105 AccuMulate was then run for each of the strains, J2 (1 ancestor and 7 MA lines), M5 (1 ancestor and 7  
106 MA lines) and LC3.6 (1 ancestor and 4 MA lines) using the reference genome and specifying the  
107 following individual parameters for *D. galeata*: nucleotide frequencies of the reference genome (0.306  
108 0.194 0.194 0.306, respectively), probability of sequencing error (0.001), ploidy of descendants (2) and  
109 ancestor (2).

110 The output table was then further filtered with a custom python script according to probability of a  
111 mutation/one mutation/of correct descendant genotype ( $\geq 0.90$ ); number of reads matching the  
112 putatively-mutant allele in samples that are not mutants ( $=0$ ); AD test statistic for mapping quality  
113 difference ( $\geq 1.95$ ); p-value from a Fisher's exact test for Strand Bias and Pair-mapping rate difference  
114 ( $>0.05$ ). The final candidate list was then visually checked with IGV (Thorvaldsdóttir, et al. 2013) for  
115 validation.

116 To calculate the effective population size  $N_e$ , we estimated Watterson's theta ( $\theta$ ) (Watterson, 1975)  
117 based on a sample that consisted of 12 resequenced *D. galeata* genomes from Dobersdorfer See,  
118 Germany from Nickel, et al. (in prep.). We computed genotype likelihoods in ANGSD v0.931  
119 (Korneliussen et al., 2014) from BAM files aligned to the reference genome for all 4-fold degenerate  
120 sites using the SAMtools model (option `-GL 1`). Sites were filtered for a minimum mapping quality score  
121 of 30, a minimum base quality score of 20 and reads that had multiple mapping best hits or secondary  
122 hits were removed. The folded site frequency spectrum was calculated with the realSFS program and  
123 used as prior to estimate per-site Watterson's  $\theta$  for all sites using thetaStat implemented in the ANGSD  
124 package (Korneliussen et al., 2014).

## 125 *Results*

126 From the 24 MALs, 18 produced enough offspring in the fifth generation to isolate sufficient DNA for  
127 re-sequencing. The MAL were sequenced to an overall mean coverage depth of 34.64 (s.d. = 4.47,  
128 minimum mean coverage = 22.45, maximum mean coverage = 42.86). On average,  $8.95 \times 10^7$  sites (67%  
129 of the genome assembly, s.d. =  $9.7 \times 10^6$ , min =  $6.48 \times 10^7$ , max =  $1.0 \times 10^8$ ) were callable. In total, we  
130 scanned more than 1.6 billion diploid sites for mutations (Table 1).

131 In the 18 MAL, we detected 12 single nucleotide mutations in 90 clonal generational passages (0.133  
132 mutations per passage, Table 1). The rates among clones did not differ significantly (pairwise Poisson  
133 tests,  $p > 0.05$  in all comparisons), therefore we report the mutation rate for all clones together. The  
134 haploid SNM rate  $\mu$  was calculated as  $0.745 \times 10^{-9}$  (95% cf  $0.39 \times 10^{-9} - 1.26 \times 10^{-9}$ , Table 1). This rate  
135 was slightly lower than rates reported for *Daphnia pulex*, while all were substantially lower than the

136 rate of *D. magna* (Figure 2). Using this rate, the mean  $\theta$  estimate of 0.0092 and the relation  $\theta = 4N_e\mu$ ,  
137 the estimate for the long term effective population size was  $3.09 \times 10^6$  (95% cf  $1.83 - 5.90 \times 10^6$ ) for  
138 *D. galeata*.

139 Three of the twelve observed mutations (25%) were found in exons of predicted genes. This was within  
140 expectations given that the exon-space covers 22% and the gene-space 38.8% of the *Daphnia* genome  
141 assembly (Nickel et al. in prep.). Of the three exon located mutations, one (dgal270.8936) was a  
142 synonymous G > C change at a 4fold degenerate site in a protein of unknown function. The two others  
143 resulted in non-synonymous changes. The G > A change at dgal9.390326 in a gene annotated as *Cellular*  
144 *nucleic acid-binding protein* caused an amino acid change from Proline > Leucine. A gene annotated as  
145 *Density-regulated protein* showed an A > C transversion (dgal121.469817) that resulted in a Lysine >  
146 Threonine exchange.

147 The ratio between A/T > G/C and G/C > A/T mutations was  $7/4 = 1.75$ , which is in line with the observed  
148 GC content of 38.75% in the *D. galeata* genome. The ratio of transitions (4) to transversions (8) was  
149 0.5, which is exactly the unbiased expectation.

## 150 *Discussion*

151 We report here for the first time a directly estimated clonal mutation rate for *Daphnia galeata*, a  
152 widely used model species. The obtained rate will significantly strengthen population- and  
153 comparative genomic approaches and serve as base line in evolutionary experiments of factors  
154 influencing the mutation rate. In contrast to other mutation rate estimates in *Daphnia* (Keith, et al.  
155 2016; (Bull, et al. 2019; Flynn, et al. 2017; Ho, et al. 2020), which relied on MAL over several dozen  
156 generations, we have used the less time consuming short term mutation accumulation approach  
157 recently devised by (Oppold and Pfenninger 2017). While we obtained an accurate (low) mutation rate,  
158 the number of accumulated mutations was too low for meaningful analyses and comparisons of the  
159 mutational spectrum. However, information on the mutational spectrum will accumulate in future  
160 experiments to remedy this deficiency.

161 The spontaneous mutation rate of *D. galeata* reported here was slightly lower than rates estimated  
162 for *D. pulex* and much lower than for *D. magna*. Because the effective population size of the species  
163 was also the highest among the three species for *D. galeata* ( $N_e = 7.8 \times 10^5$  in *D. pulex*, Lynch, et al.  
164 (2017) and  $4.2 \times 10^5$  in *D. magna*, Ho, et al. (2020)), our results support the drift-barrier hypothesis,  
165 which predicts that the mutation rate should be as low as drift limited selection permits, because  
166 mutations are generally deleterious (Sung et al 2012). We found only few mutations per clonal  
167 generational passage (0.133), indicating a remarkable replication fidelity at first sight. However, we  
168 measured here the mutation rate per clonal generation. Given that *Daphnia* clones go through several  
169 generations between sexual reproductions (Zaffagnini 1987), the cumulative mutation rate between  
170 sexual reproductions is likely at least a magnitude higher as the clonal mutation rate (and the  
171 calculated  $N_e$  accordingly lower), disregarding a potentially different mutation rate during sexual  
172 reproduction. Whether the use of a mutation rate estimate based on one parthenogenetic generation  
173 is appropriate to calculate the number of effectively sexually reproducing parents appears generally  
174 questionable. Lynch, et al. (2017) found a 2-5 fold discrepancy between  $N_e$  and the efficiency of  
175 selection in *D. pulex* compared to *Drosophila melanogaster*, which may have its cause in using the  
176 clonal mutation rate instead of the cumulative mutation rate between sexual reproductions.

177 Even though the number of mutations per clonal reproduction appeared to be low, this is put into a  
178 different perspective when considering the demography of the species. During peak densities, the  
179 number of individuals per square meter water column is in the order of  $10^5$  -  $10^6$  (Murtaugh 1985;  
180 Petersen 1983). Even small lakes (say, 1 ha) therefore harbour billions of individuals ( $10^9$ -  $10^{10}$ ).  
181 Assuming that the mutation rate inferred here also applies to natural conditions, a fraction of 0.133 of  
182 them carries a single nucleotide mutation relative to the previous generation. Therefore, the  
183 demographic peak generation in the hypothetical lake alone carries  $1.33 \times 10^8$  –  $1.33 \times 10^9$  newly arisen  
184 mutations. With an estimated total genome size of about  $1.6 \times 10^8$ , each genome position is therefore  
185 hit mathematically between 0.8 and 8 times by a mutation in such a population. Even if the density  
186 may be lower in other lakes and vary within lake, it is fair to assume that populations at least in  
187 moderately sized lakes are not mutation limited. Every possible mutation is practically always present  
188 in the population and in larger lakes, perhaps even in every clonal lineage. This almost permanent  
189 presence of exhaustive genetic variation should offer excellent opportunities for adaptive tracking of  
190 changing environmental conditions (Pfenninger and Foucault 2020), moreover since clonal  
191 reproduction should help to avoid stochastic loss of beneficial mutations (Kimura 1962; Messer and  
192 Petrov 2013). In addition, the occasional seasonal sexual reproduction allows to recombine favourable  
193 variation together. This extraordinary, mutation-driven propensity of *Daphnia* for rapid adaptation  
194 may be the background for the observed monopolisation of lakes by particular clones (De Meester, et  
195 al. 2002).

#### 196 *Acknowledgements*

197 The authors thank the LOEWE-Centre TBG funded by the Hessen State Ministry of Higher Education,  
198 Research and the Arts (HMWK).

199

#### 200 *References*

201 Acuna-Hidalgo R, Veltman JA, Hoischen A 2016. New insights into the generation and role of de novo  
202 mutations in health and disease. *Genome Biology* 17: 1-19.

203 Bolger AM, Lohse M, Usadel B 2014. Trimmomatic: a flexible trimmer for Illumina sequence data.  
204 *Bioinformatics* 30: 2114-2120.

205 Brede N, et al. 2009. The impact of human-made ecological changes on the genetic architecture of  
206 *Daphnia* species. *Proceedings of the National Academy of Sciences* 106: 4758-4763.

207 Bull JK, Flynn JM, Chain FJ, Cristescu ME 2019. Fitness and genomic consequences of chronic  
208 exposure to low levels of copper and nickel in *Daphnia pulex* mutation accumulation lines. *G3:*  
209 *Genes, Genomes, Genetics* 9: 61-71.

210 Charlesworth B 2009. Effective population size and patterns of molecular evolution and variation.  
211 *Nature Reviews Genetics* 10: 195-205.

212 Cui R, Kwak JI, An Y-J 2018. Comparative study of the sensitivity of *Daphnia galeata* and *Daphnia*  
213 *magna* to heavy metals. *Ecotoxicology and Environmental Safety* 162: 63-70.

214 De Meester L, Gómez A, Okamura B, Schwenk K 2002. The Monopolization Hypothesis and the  
215 dispersal–gene flow paradox in aquatic organisms. *Acta Oecologica* 23: 121-135.

- 216 Flynn JM, Chain FJ, Schoen DJ, Cristescu ME 2017. Spontaneous mutation accumulation in *Daphnia*  
217 *pulex* in selection-free vs. competitive environments. *Molecular Biology and Evolution* 34: 160-173.
- 218 Hall DJ 1964. An experimental approach to the dynamics of a natural population of *Daphnia galeata*  
219 *mendotae*. *Ecology* 45: 94-112.
- 220 Herrmann M, Ravindran SP, Schwenk K, Cordellier M (2018) Population transcriptomics in *Daphnia*:  
221 the role of thermal selection. *Molecular Ecology* 27: 387-402.
- 222 Hiroshi Akashi RMK, Eyre-Walker A 2012. Mutation pressure, natural selection, and the evolution of  
223 base composition in *Drosophila*. *Mutation and Evolution* 7: 49-60.
- 224 Ho EK, et al. 2020. High and highly variable spontaneous mutation rates in *Daphnia*. *Molecular*  
225 *Biology and Evolution*.
- 226 Ho SY 2014. The changing face of the molecular evolutionary clock. *Trends in Ecology & Evolution* 29:  
227 496-503.
- 228 Huylmans AK, López Ezquerro A, Parsch J, Cordellier M 2016. De Novo Transcriptome Assembly and  
229 Sex-Biased Gene Expression in the Cyclical Parthenogenetic *Daphnia galeata*. *Genome Biology and*  
230 *Evolution* 8: 3120-3139. doi: 10.1093/gbe/evw221
- 231 Johnson T, Barton N 2005. Theoretical models of selection and mutation on quantitative traits.  
232 *Philosophical Transactions of the Royal Society B: Biological Sciences* 360: 1411-1425.
- 233 Keith N, et al. 2016. High mutational rates of large-scale duplication and deletion in *Daphnia pulex*.  
234 *Genome Research* 26: 60-69.
- 235 Kimura M 1962. On the probability of fixation of mutant genes in a population. *Genetics* 47: 713.
- 236 Klüttgen B, Dülmer U, Engels M, Ratte HT 1994. ADaM, an artificial freshwater for the culture of  
237 zooplankton. *Water Research* 28:743-746.
- 238 Korneliussen, TS, Albrechtsen, A, and Nielsen, R 2014. ANGSD: Analysis of Next Generation  
239 Sequencing Data. *BMC Bioinformatics* 15: 356.
- 240 Li H, Durbin R 2009. Fast and accurate short read alignment with Burrows-Wheeler Transform.  
241 *Bioinformatics* 25: 1754-1760.
- 242 Lynch M, et al. 2017. Population genomics of *Daphnia pulex*. *Genetics* 206: 315-332.
- 243 McKenna A, et al. 2010. The Genome Analysis Toolkit: a MapReduce framework for analyzing next-  
244 generation DNA sequencing data. *Genome Research* 20: 1297-1303.
- 245 Messer PW, Petrov DA 2013. Population genomics of rapid adaptation by soft selective sweeps.  
246 *Trends in Ecology & Evolution* 28: 659-669.
- 247 Miner BE, et al. 2012. Linking genes to communities and ecosystems: *Daphnia* as an ecogenomic  
248 model. *Proceedings of the Royal Society Biological Sciences* 279: 1873-1882. doi:  
249 10.1098/rspb.2011.2404
- 250 Murtaugh PA 1985. Vertical distributions of zooplankton and population dynamics of *Daphnia* in a  
251 meromictic lake. *Hydrobiologia* 123: 47-57.
- 252 Oppold AM, Pfenninger M 2017. Direct estimation of the spontaneous mutation rate by short-term  
253 mutation accumulation lines in *Chironomus riparius*. *Evolution Letters* 1: 86-92.

- 254 Petersen F 1983. Population dynamics and production of *Daphnia galeata* (Crustacea, Cladocera) in  
255 Lake Esrom. *Ecography* 6: 285-294.
- 256 Pfenninger M, Foucault Q 2020. Quantifying the selection regime in a natural *Chironomus riparius*  
257 population. bioRxiv doi.org/10.1101/2020.06.16.154054
- 258 Pfenninger M, et al. 2015. Unique evolutionary trajectories in repeated adaptation to hydrogen  
259 sulphide-toxic habitats of a neotropical fish (*Poecilia mexicana*). *Molecular Ecology* 24: 5446-5459.
- 260 Schiffels S, Durbin R 2014. Inferring human population size and separation history from multiple  
261 genome sequences. *Nature Genetics* 46: 919-925.
- 262 Sniegowski PD, Gerrish PJ 2010. Beneficial mutations and the dynamics of adaptation in asexual  
263 populations. *Philosophical Transactions of the Royal Society B: Biological Sciences* 365: 1255-1263.
- 264 Sung W, Ackerman MS, Miller SF, Doak TG, Lynch M 2012. Drift and the evolution of mutation rates.  
265 *Proceedings of the National Academy of Sciences* 109: 18488-18492
- 266 Tams V, Lüneburg J, Seddar L, Detampel J-P, Cordellier M 2018. Intraspecific phenotypic variation in  
267 life history traits of *Daphnia galeata* populations in response to fish kairomones. *PeerJ* 6: e5746.
- 268 Thorvaldsdóttir H, Robinson JT, Mesirov JP 2013. Integrative Genomics Viewer (IGV): high-  
269 performance genomics data visualization and exploration. *Briefings in Bioinformatics* 14: 178-192.
- 270 Weber A, Declerck S 1997. Phenotypic plasticity of *Daphnia* life history traits in response to predator  
271 kairomones: genetic variability and evolutionary potential. *Hydrobiologia* 360: 89-99.
- 272 Winter DJ, et al. 2018. accuMulate: A mutation caller designed for mutation accumulation  
273 experiments. *Bioinformatics* 34: 2659-2660.
- 274 Zaffagnini F. 1987. Reproduction in *Daphnia*. In: Peters RH, de Bernardi R, editors. *Daphnia: Mem.*  
275 *dell'istituto Ital. di Idrobiologia: Consiglio Nazionale delle Ricerche*. p. 245-284.
- 276 Zhang C, Jansen M, De Meester L, Stoks R 2019. Rapid evolution in response to warming does not  
277 affect the toxicity of a pollutant: Insights from experimental evolution in heated mesocosms.  
278 *Evolutionary Applications* 12: 977-988.
- 279

280 Tables

281 Table 1. Information on the short term mutation accumulation lines (MAL) from three clones of  
 282 *D. galeata* investigated.

| <i>D. galeata</i> clone | MAL  | mean coverage | number of callable sites | of number of mutations |
|-------------------------|------|---------------|--------------------------|------------------------|
| J2                      | MA1a | 35.25         | 95,267,650               | 0                      |
|                         | MA2b | 36.85         | 88,640,972               | 1                      |
|                         | MA3a | 30.37         | 72,474,255               | 0                      |
|                         | MA4a | 41.88         | 64,808,013               | 0                      |
|                         | MA5b | 42.86         | 80,960,726               | 0                      |
|                         | MA7a | 35.27         | 95,314,644               | 0                      |
|                         | MA8a | 31.86         | 89,598,402               | 1                      |
| LC3                     | MA2b | 35.65         | 89,054,870               | 0                      |
|                         | MA3a | 32.87         | 91,392,896               | 0                      |
|                         | MA6d | 36.01         | 91,666,778               | 2                      |
|                         | MA7b | 37.03         | 86,928,290               | 1                      |
| M5                      | MA1a | 34.93         | 97,670,050               | 1                      |
|                         | MA2a | 30.01         | 92,199,621               | 1                      |
|                         | MA3a | 22.45         | 77,111,849               | 1                      |
|                         | MA5a | 36.77         | 99,118,092               | 1                      |
|                         | MA6a | 34.86         | 100,230,463              | 1                      |
|                         | MA7a | 33.33         | 97,994,099               | 2                      |
|                         | MA8a | 35.28         | 95,621,976               | 0                      |
| TOTAL                   | 18   |               | 1,606,053,646            | 12                     |

283

284 Table 2. List of mutation positions, their characteristics and effect.

| <i>D. galeata</i> clone | MAL  | scaffold | position | SNM   | transition (ts) or transversion (tv) | amino acid change | gene function an           |
|-------------------------|------|----------|----------|-------|--------------------------------------|-------------------|----------------------------|
| J2                      | MA8a | dgal52   | 163689   | G > A | ts                                   | -                 | -                          |
|                         | MA2b | dgal61   | 450819   | C > A | tv                                   | -                 | -                          |
| LC3                     | MA6d | dgal3    | 462655   | G > T | tv                                   | -                 | -                          |
|                         | MA7b | dgal98   | 307348   | A > C | tv                                   | -                 | -                          |
|                         | MA6d | dgal9    | 531976   | C > T | ts                                   | -                 | -                          |
| M5                      | MA5a | dgal9    | 390326   | G > A | ts                                   | P > L             | Cellular nucleic a protein |
|                         | MA1a | dgal24   | 857256   | A > C | tv                                   | -                 | -                          |
|                         | MA7a | dgal40   | 527171   | A > C | tv                                   | -                 | -                          |
|                         | MA3a | dgal57   | 335627   | C > G | tv                                   | -                 | -                          |
|                         | MA7a | dgal57   | 589433   | C > T | ts                                   | -                 | -                          |
|                         | MA2a | dgal121  | 469817   | A > C | tv                                   | K > T             | Density-regulate           |
|                         | MA6a | dgal270  | 8936     | G > T | tv                                   | 4 fold degenerate | unknown functio            |

285



286 Figure 1. Schematic experimental set-up for the short term mutation accumulation lines per clone.

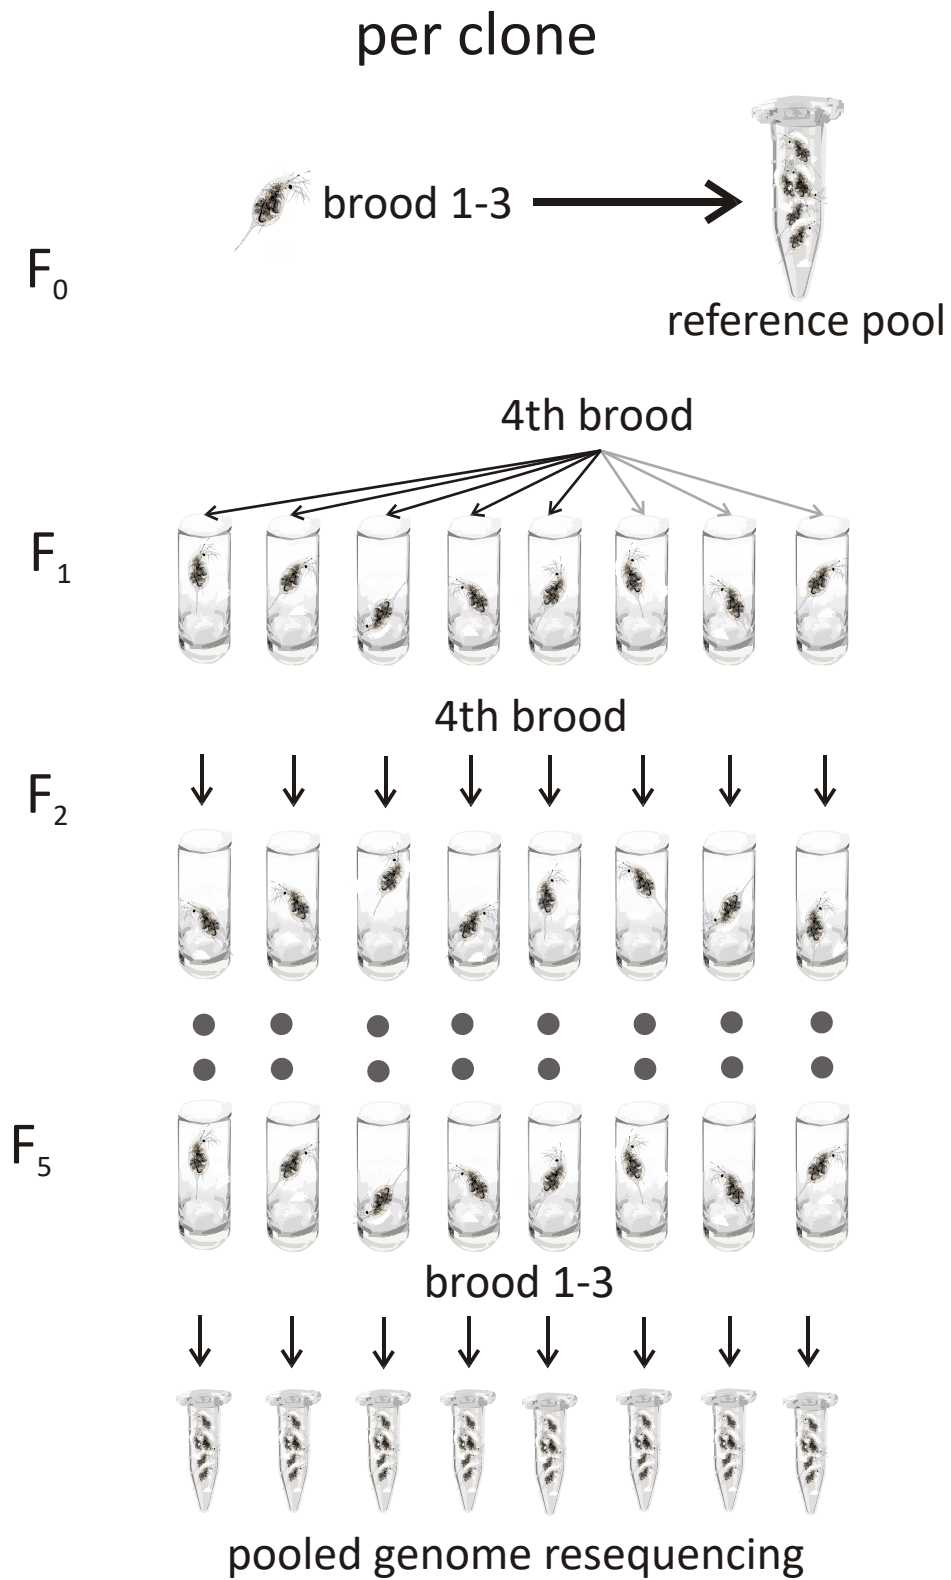

287

288

289 Figure 2. Haploid mutation rate (+/- 95% c.f.) of *Daphnia galeata* in comparison to other directly  
290 measured mutation rates of the genus.

291

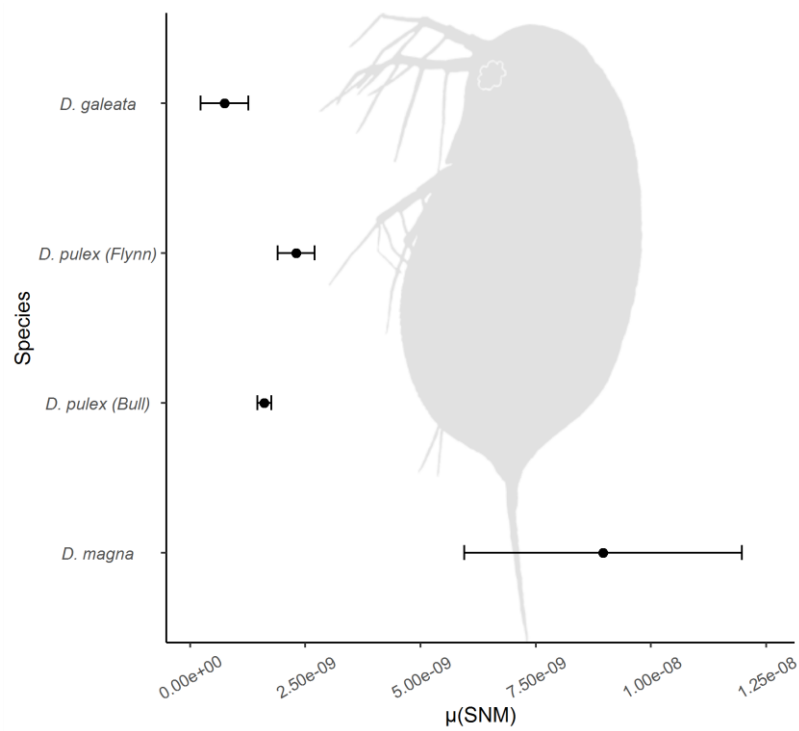

292

293

294
